# Supplementary material for: Defect-induced nucleation and epitaxial growth of a MOF-derived hierarchical Mo2C@Co architecture for an efficient hydrogen evolution reaction
Source: Royal Society of Chemistry journal article supplement (doi:10.1039/d0ra01197e), 2020-01-01
Supplement: d0ra01197e1.pdf [file d0ra01197e1.pdf]

## Electronic Supporting Information

### Defect-Induced Nucleation and Epitaxial Growth of MOF-Derived Hierarchical $\text{Mo}_2\text{C}@Co$ Architecture for Efficient Hydrogen Evolution Reaction

Linfei Zhang<sup>a, b</sup>, Jingting Zhu,<sup>a</sup> Yumeng Shi,<sup>a</sup> Zhuo Wang<sup>a, \*</sup> and Wenjing Zhang<sup>a, \*</sup>

*a. Institute of Microscale Optoelectronics, Shenzhen University, Shenzhen 518060, P. R. China*

*b. College of Physics and optoelectronic Engineering, Shenzhen University, Shenzhen 518060, P. R. China*

\* Address correspondence to [wjzhang@szu.edu.cn](mailto:wjzhang@szu.edu.cn) and [wzhuo@szu.edu.cn](mailto:wzhuo@szu.edu.cn)

# The authors made equal contribution.

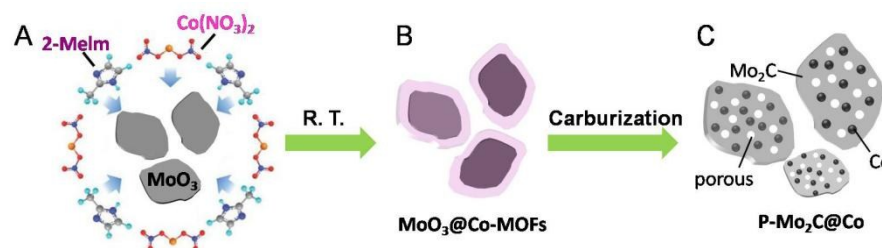

**Figure S1.** Schematic illustration of the synthetic processes of P-Mo<sub>2</sub>C@Co hybrid nanostructure. The MoO<sub>3</sub> nanosheets leads to the formation of core-shell MoO<sub>3</sub>@Co-MOFs precursor and the final product of porous Mo<sub>2</sub>C@Co.

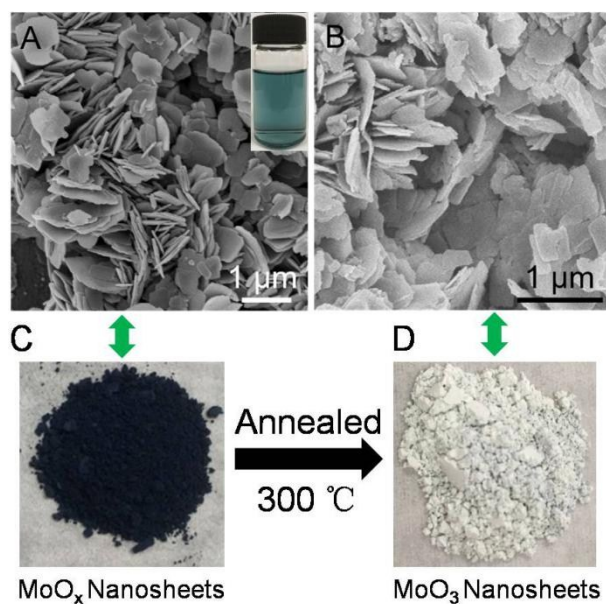

**Figure S2.** SEM images of the MoO<sub>x</sub> nanosheets (A) and MoO<sub>3</sub> nanosheets (B), and corresponding to the photograph of powder (C and D). The inset in (A) shows a photograph of the MoO<sub>x</sub> product dispersed in ethanol.

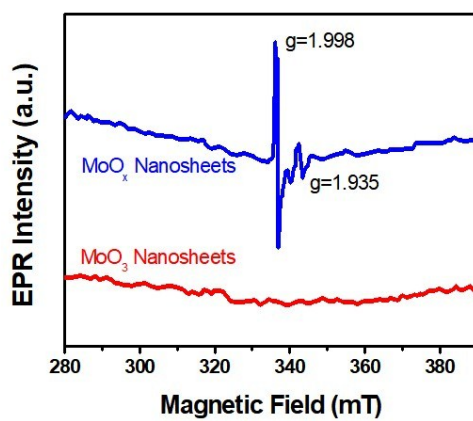

**Figure S3.** X-band EPR spectrum of MoO<sub>x</sub> and MoO<sub>3</sub> nanosheets recorded at room temperature.

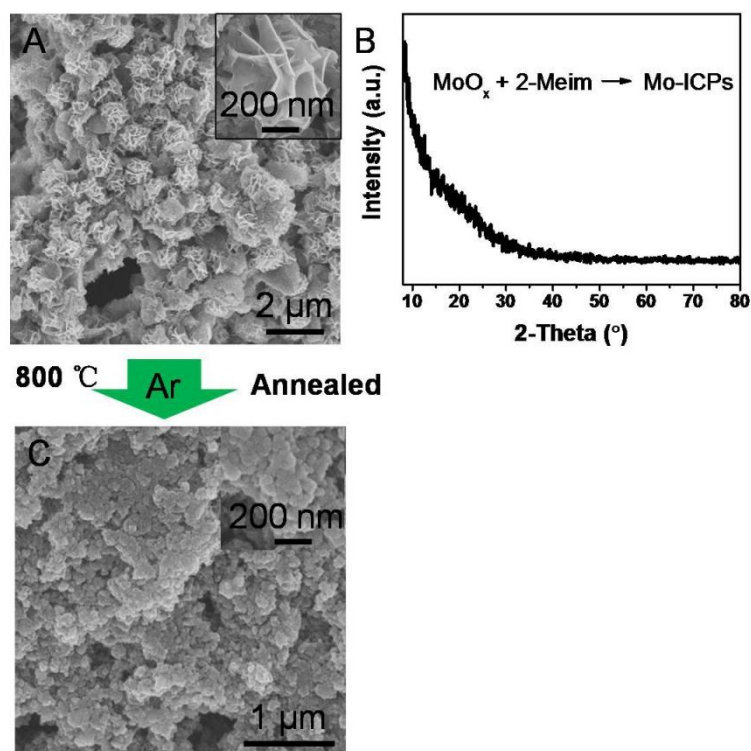

**Figure S4.** SEM image (A) and XRD pattern (B) of the Mo-ICPs. The powder X-ray diffraction data for the Mo-ICPs indicates that it is amorphous and not crystalline, which is the difference between ICPs and MOFs. (C) Pyrolysis at 800 °C, the Mo-ICPs was converted to highly agglomerated Mo<sub>2</sub>C NCs. The inset of (A) shows the high-magnification SEM images.

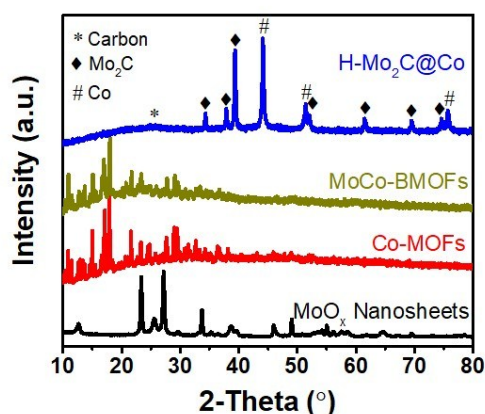

**Figure S5.** Powder XRD patterns of MoO<sub>x</sub> nanosheets, Co-MOFs, MoCo-BMOFs and H-Mo<sub>2</sub>C@Co hybrid.

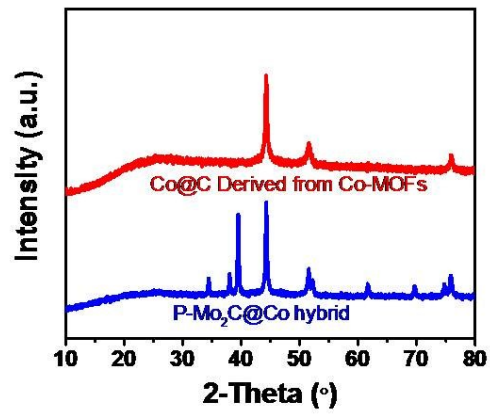

**Figure S6.** XRD pattern of the P-Mo<sub>2</sub>C@Co hybrid and Co@C derived from Co-MOFs.

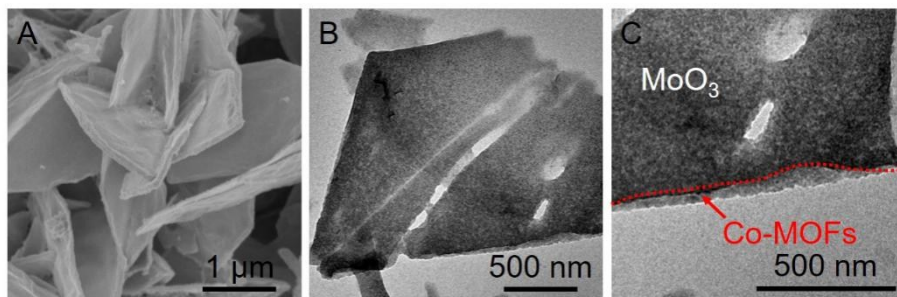

**Figure S7.** SEM image (A) and TEM images (B, C) of the MoO<sub>3</sub>@Co-MOFs

precursor. The figures show that the Co-MOFs layer could be coated on surface of the MoO<sub>3</sub> nanosheets.

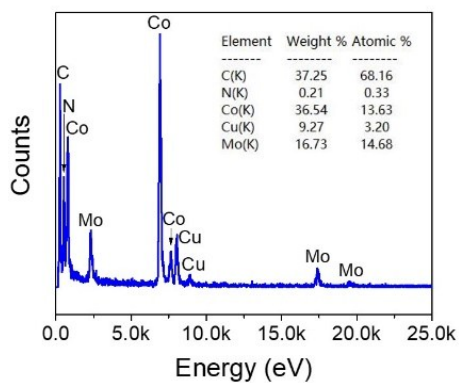

**Figure S8.** EDS spectrum of the H-Mo<sub>2</sub>C@Co. The inset is element percentage.

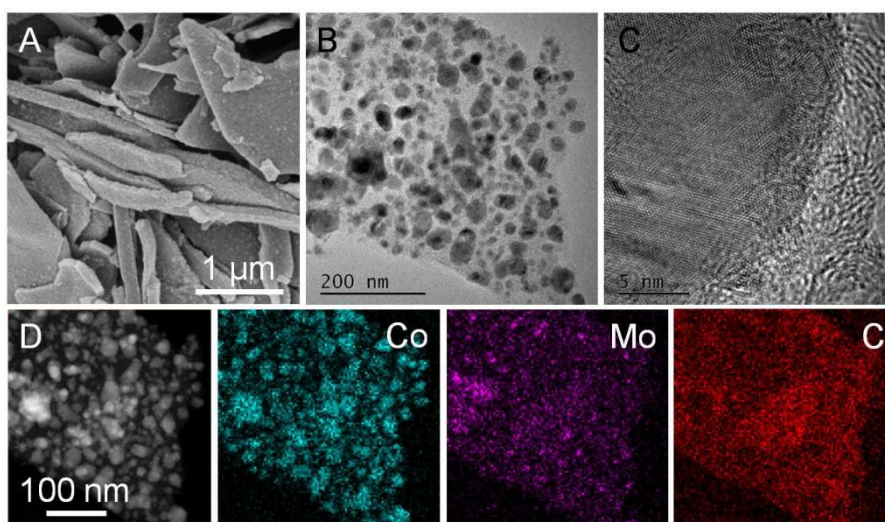

**Figure S9.** (A) SEM image, (B) TEM images, and (C) HRTEM image, (D) EDS mapping of the P-Mo<sub>2</sub>C@Co and each element.

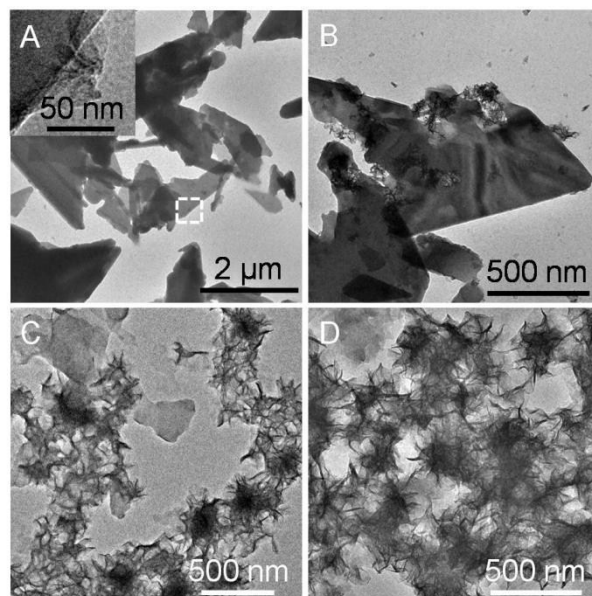

**Figure S10.** Typical TEM images of MoCo-BMOFs products after reaction for (A) 1 h (inset: magnified image from white frame), (B) 4 h, (C) 8 h and (D) 12 h.

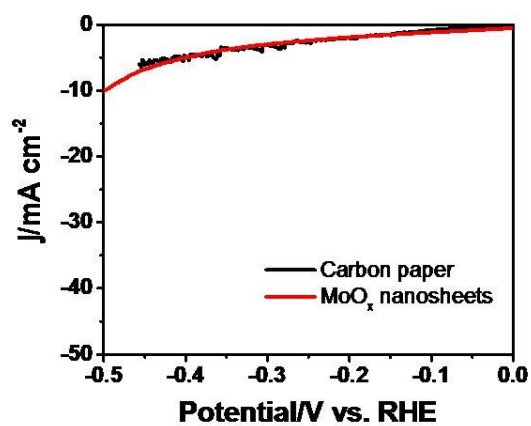

**Figure S11.** Polarization curve of bare carbon paper and  $\text{MoO}_x$  nanosheets in 0.5 M  $\text{H}_2\text{SO}_4$  for evaluating HER activity.

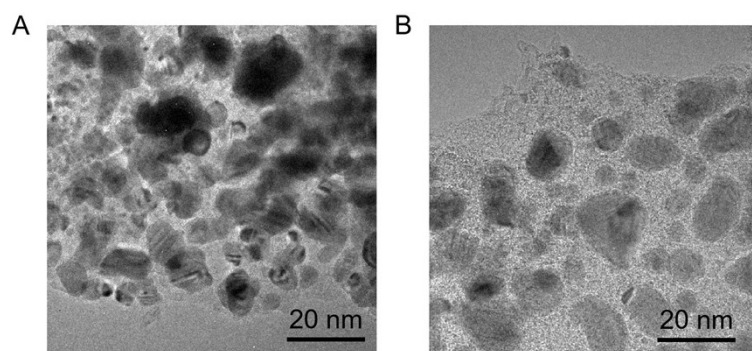

**Figure S12.** (A) and (B) are high-magnification TEM images of P-Mo<sub>2</sub>C@Co and H-Mo<sub>2</sub>C@Co.

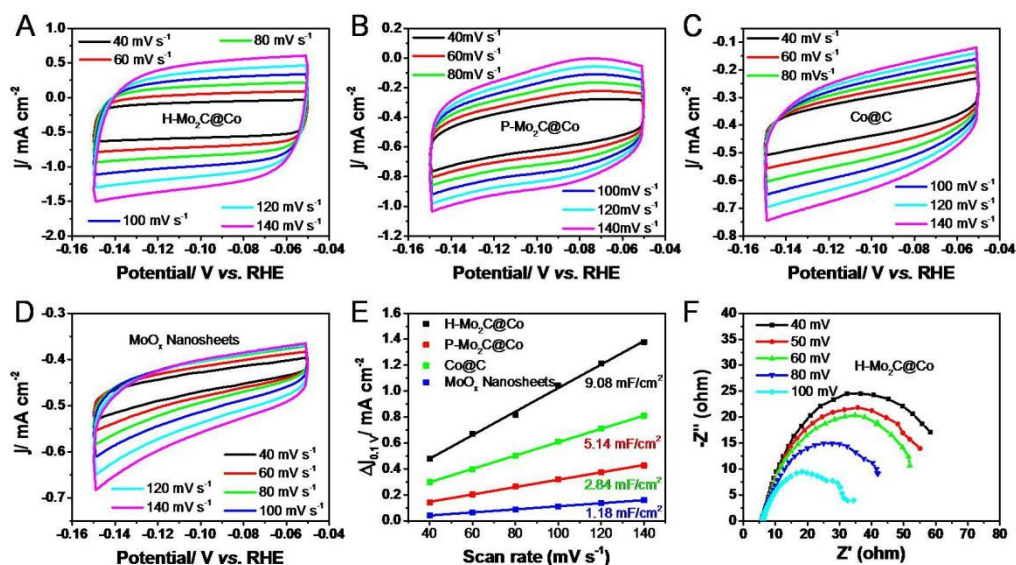

**Figure S13.** (A-D) Cyclic voltammograms at various scan rates in the region of -0.05V to -0.15 V (vs. RHE) for different catalysts. (E) Variation of double-layer charging currents of different catalysts at 100 mV (vs. RHE) under various scan rates, respectively. (F) Nyquist plots of hierarchical Mo<sub>2</sub>C@Co hybrid at various HER overpotentials.

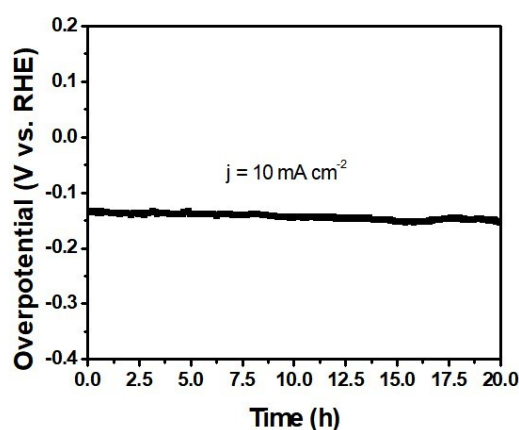

**Figure S14.** Chronopotentiometric curve recorded at  $j = -10 \text{ mA cm}^{-2}$  for 20 h in 0.5 M H<sub>2</sub>SO<sub>4</sub>.



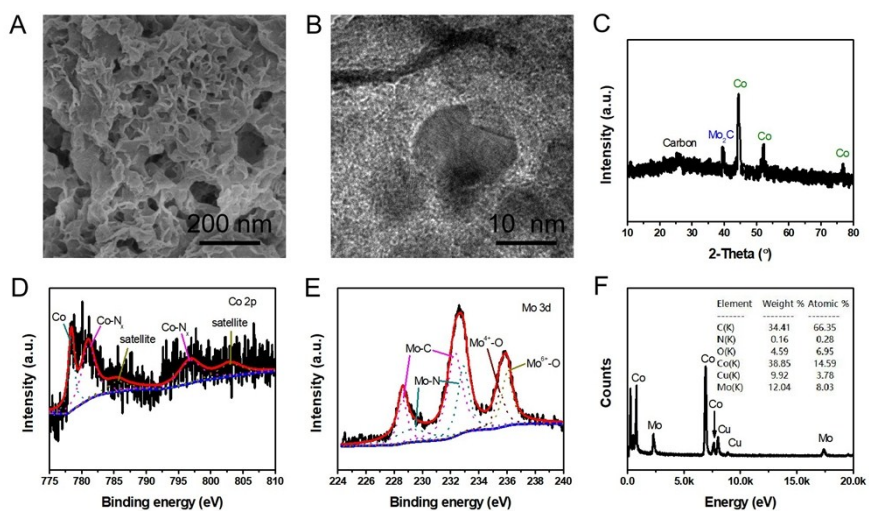

**Figure S15.** Structure and chemical state analyses of the post-HER H-Mo<sub>2</sub>C@Co/CFP electrode after 20 hours' chronopotentiometry test at  $j = -10 \text{ mA cm}^{-2}$ . (A) FESEM, (B) TEM, (C) XRD pattern, (D) Co 2p, (E) Mo 3d core level XPS spectra and (F) EDS, respectively.

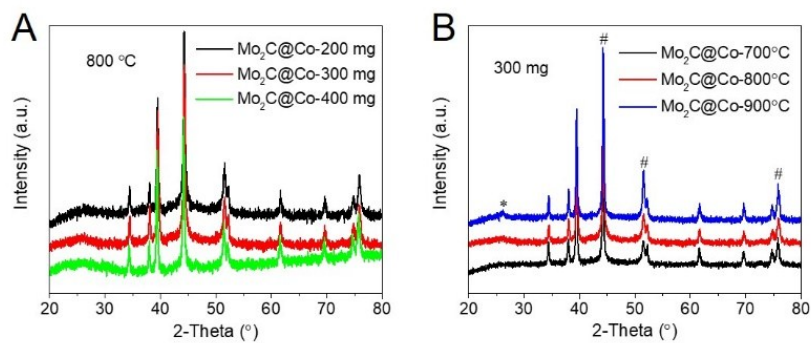

**Figure S16.** XRD patterns of H-Mo<sub>2</sub>C@Co hybrid samples prepared by using different dosage of MoO<sub>x</sub> (A) and different annealing temperatures (B).

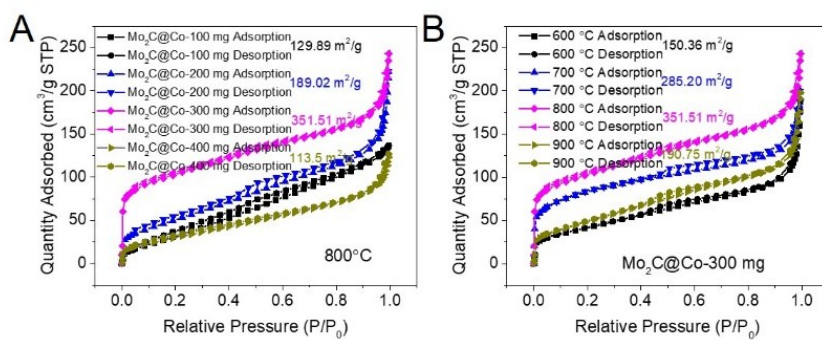

**Figure S17.** N<sub>2</sub> adsorption-desorption isotherm curves of the different H-Mo<sub>2</sub>C@Co hybrid samples. (A) Different amounts of MoO<sub>x</sub> nanosheets, (B) Different annealing temperatures.

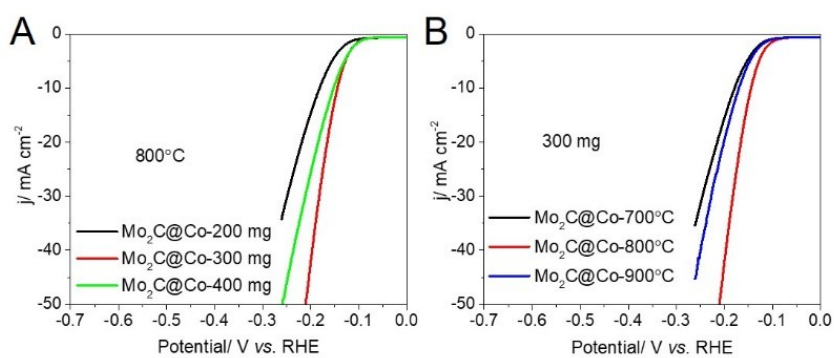

**Figure S18.** Polarization curves of H-Mo<sub>2</sub>C@Co hybrid with different MoO<sub>x</sub> dosage and different annealing temperatures in 0.5 M H<sub>2</sub>SO<sub>4</sub>.

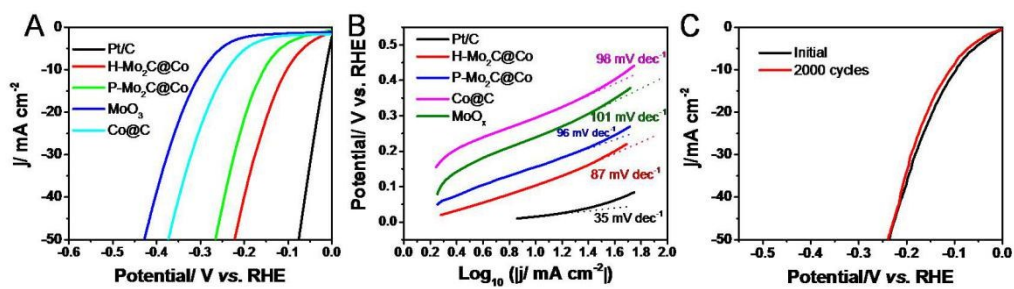

**Figure S19.** (A) Polarization curves and (B) Tafel plots of H-Mo<sub>2</sub>C@Co, P-Mo<sub>2</sub>C@Co, MoO<sub>x</sub>, Co@C and reference Pt/C, recorded in 1.0 M KOH at a scan rate of 10 mV dec<sup>-1</sup>.

of  $5 \text{ mV s}^{-1}$ . (C) Durability test of H-Mo<sub>2</sub>C@Co hybrid in 1.0 M KOH.

**Table S1. Comparison of HER performance in acidic and alkaline media of H-Mo<sub>2</sub>C@Co with other non-noble metal electrocatalysts.**

| Catalyst                                | Current density (j, mA/cm <sup>2</sup> ) | $\eta$ at the corresponding j (mV) | Tafel slope (mV/dec) | Electrolyte                          | Reference                                       |
|-----------------------------------------|------------------------------------------|------------------------------------|----------------------|--------------------------------------|-------------------------------------------------|
| H-Mo <sub>2</sub> C@Co                  | 10                                       | 144                                | 58                   | 0.5 M H <sub>2</sub> SO <sub>4</sub> | This work                                       |
|                                         | 10                                       | 103                                | 87                   | 1.0 M KOH                            | This work                                       |
| Ni-Mo <sub>2</sub> C/NCNFs              | 10                                       | 196                                | 77.4                 | 1.0 M KOH                            | Adv. Energy Mater. 2019, 9, 1803185             |
| Co/ $\beta$ -Mo <sub>2</sub> C@N-CNTs   | 10                                       | 170                                | 92                   | 1.0 M KOH                            | Angew. Chem. Int. Ed. 2019, 58, 4923-4928       |
| Ni/Mo <sub>2</sub> C-PC                 | 10                                       | 210                                | 140                  | 1.0 M KOH                            | Chem. Sci., 2017, 8, 968                        |
| Ni-Mo <sub>2</sub> C@C                  | 10                                       | 169                                | 100                  | 0.5 M H <sub>2</sub> SO <sub>4</sub> | J. Mater. Chem. A 2017, 5, 5000                 |
|                                         | 10                                       | 181                                | 84                   | 1.0 M KOH                            |                                                 |
| $\beta$ -Mo <sub>2</sub> C nanotubes    | 10                                       | 172                                | 62                   | 0.5 M H <sub>2</sub> SO <sub>4</sub> | Angew. Chem. Int. Ed. 2015, 54, 15395           |
|                                         | 10                                       | 112                                | 55                   | 1.0 M KOH                            |                                                 |
| Mo <sub>2</sub> N-Mo <sub>2</sub> C/HGr | 10                                       | 157                                | 55                   | 0.5 M H <sub>2</sub> SO <sub>4</sub> | Adv. Mater. 2018, 30, 1704156                   |
|                                         | 10                                       | 154                                | 68                   | 1.0 M KOH                            |                                                 |
| Mo <sub>2</sub> C/Graphene composites   | 10                                       | 150                                | 57                   | 0.5 M H <sub>2</sub> SO <sub>4</sub> | Chem. Commun. 2015, 51, 8323                    |
| Mo <sub>2</sub> C/CNT-GR                | 10                                       | 148                                | 58                   | 0.5 M H <sub>2</sub> SO <sub>4</sub> | ACS Nano 2014, 8, 5164                          |
| Mo <sub>2</sub> C/NCF                   | 10                                       | 144                                | 55                   | 0.5 M H <sub>2</sub> SO <sub>4</sub> | ACS Nano 2016, 10, 11337                        |
| Mo <sub>2</sub> C/C hybrids             | 10                                       | 146                                | 60                   | 0.5 M H <sub>2</sub> SO <sub>4</sub> | Adv. Energy Mater. 2017, 7, 1602782             |
|                                         | 10                                       | 140                                | 58                   | 1.0 M KOH                            |                                                 |
| Mo <sub>2</sub> C@C nanospheres         | 10                                       | 141                                | 56                   | 0.5 M H <sub>2</sub> SO <sub>4</sub> | ACS Nano 2016, 10, 8851                         |
| Mo <sub>2</sub> C/CNT                   | 10                                       | 152                                | 65                   | 0.5 M H <sub>2</sub> SO <sub>4</sub> | Energy Environ. Sci. 2013, 6, 943               |
| Mo <sub>2</sub> C/GCSs                  | 10                                       | 200                                | 62.6                 | 0.5 M H <sub>2</sub> SO <sub>4</sub> | ACS Catal. 2014, 4, 2658                        |
| MoC <sub>x</sub> nanooctahedrons        | 10                                       | 142                                | 53                   | 0.5 M H <sub>2</sub> SO <sub>4</sub> | Nat. Commun. 2015, 6, 6512                      |
|                                         | 10                                       | 151                                | 59                   | 1.0 M KOH                            |                                                 |
| Co-Mo <sub>2</sub> C@NGCS               | 10                                       | 161                                | 60                   | 1.0 M KOH                            | Mater. Chem. Front. 2020, 4, 546                |
| CoS-MoS                                 | 10                                       | 134                                | 59.5                 | 0.5 M H <sub>2</sub> SO <sub>4</sub> | Adv. Sci. 2019, 6, 1900140                      |
| Co <sub>4</sub> Mo <sub>2</sub> @NC     | 10                                       | 218                                | 74                   | 1.0 M KOH                            | J. Mater. Chem. A, 2017, 5, 16929               |
| Co-Mo <sub>2</sub> C@NCNT               | 10                                       | 186                                | 79                   | 1.0 M KOH                            | ACS Sustainable Chem. Eng., 2018, 6, 9912-9920. |
|                                         | 10                                       | 187                                | 82                   | 0.5 M H <sub>2</sub> SO <sub>4</sub> |                                                 |
| Mo/Co@N-C                               | 10                                       | 157                                | 148                  | 1.0 M KOH                            | Small 2018, 14, 1704227                         |
|                                         | 10                                       | 157                                | 148                  | 1.0 M KOH                            |                                                 |

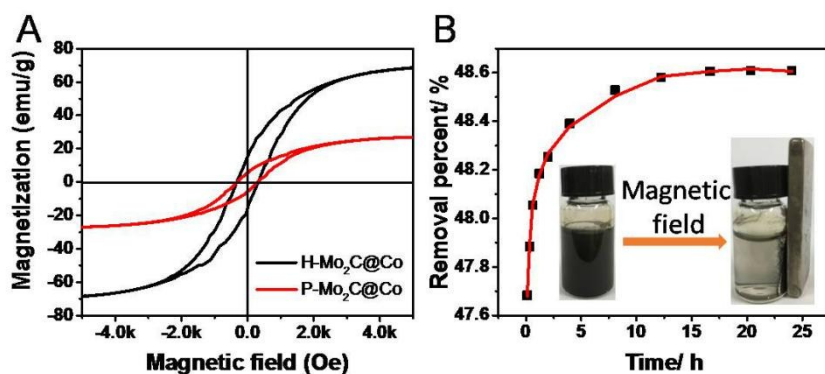

**Figure S20.** (A) Room-temperature magnetic hysteresis loops of the H-Mo<sub>2</sub>C@Co and P-Mo<sub>2</sub>C@Co. (B) Time profile of arsenic ion adsorption on H-Mo<sub>2</sub>C@Co. The inset shows the H-Mo<sub>2</sub>C@Co lifted by a magnet.

Kinetics adsorption of As (V) on H-Mo<sub>2</sub>C@Co was investigated in the presence of 0.5 mg mL<sup>-1</sup> of adsorbent. Figure S15B shows that the adsorption rate is considerably fast within the first 2.5 h, it becomes slow from 2.5 to 12.5 h, and no significant change is observed from 12.5 to 24 h. This phenomenon that the adsorption reached equilibrium state quickly indicates that the adsorption of As (V) on H-Mo<sub>2</sub>C@Co was mainly attributed to chemical sorption or surface complexation. The binding of As (V) anions on the surface of H-Mo<sub>2</sub>C@Co is ascribed to the strong electrostatic interaction between As (V) and H-Mo<sub>2</sub>C@Co structure. In addition, amorphous carbon may provide extra adsorption sites for As adsorption.
